# Supplementary material
Source: PubMed Central journal article supplement (PMC2893247)
Supplement: NIHMS86561-supplement-1_si_001.pdf [file NIHMS86561-supplement-1_si_001.pdf]

## Supplemental Data

### **Molecular-Targeted Antitumor Agents 19: Furospongiolidide from a Marine *Lendenfeldia* sp. Sponge Inhibits Hypoxia-Inducible Factor-1 (HIF-1) Activation in Breast Tumor Cells**

Yang Liu,<sup>†,⊥</sup> Rui Liu,<sup>†,⊥</sup> Shui-Chun Mao,<sup>†</sup> J. Brian Morgan,<sup>†</sup> Mika B. Jekabsons,<sup>‡</sup> Yu-Dong Zhou,<sup>\*†</sup> and Dale G. Nagle<sup>\*†</sup>

*Department of Pharmacognosy and Research Institute of Pharmaceutical Sciences, School of Pharmacy, University of Mississippi, University, MS 38677-1848; Department of Biology, University of Mississippi, University, MS 38677*

<sup>⊥</sup>*These authors contributed equally to this research.*

*\*Joint Corresponding Authors to whom correspondence should be addressed:*

(Y.-D.Z) Tel: (662) 915-7026. Fax: (662) 915-6975. E-mail: ydzhou@olemiss.edu

(D.G.N.) Tel: (662) 915-7026. Fax: (662) 915-6975. E-mail: dnagle@olemiss.edu

**Furospogolide; 4-[(4E,8E)-11-(3-furanyl)-4,8-dimethyl-4,8-undecadienyl]-2(5H)-furanone (ACS Registry No. 76343-80-1) (6):** Pale yellow oil;  $^1\text{H}$  NMR ( $\text{CDCl}_3$ , 600 MHz):  $\delta_{\text{H}} = 7.20$  (1H, s), 7.07 (1H, s), 6.15 (1H, s), 5.68 (1H, s), 5.05 (1H, brs), 5.00 (1H, brs), 4.59 (2H, s), 2.32 (2H, s), 2.23 (2H, s), 2.13 (2H, s), 1.99 (2H, d,  $J = 6.0$ ), 1.91 (2H, t,  $J = 6.0$ ), 1.56 (2H, t,  $J = 6.0$ ), 1.48 (6H, s).  $^{13}\text{C}$  NMR ( $\text{CDCl}_3$ , 150 MHz):  $\delta_{\text{C}} = 173.5$  (qC), 170.7 (qC), 142.2 (CH), 138.5 (CH), 135.1 (qC), 133.3 (qC), 125.2 (CH), 124.6 (qC), 123.7 (CH), 114.8 (CH), 110.8 (CH), 72.8 (CH<sub>2</sub>), 39.3 (CH<sub>2</sub>), 38.6 (CH<sub>2</sub>), 28.1 (CH<sub>2</sub>), 27.5 (CH<sub>2</sub>), 26.2 (CH<sub>2</sub>), 24.9 (CH<sub>2</sub>), 24.7 (CH<sub>2</sub>), 15.7 (CH<sub>3</sub>), 15.4 (CH<sub>3</sub>); ESIMS  $m/z$  329  $[\text{M}+\text{H}]^+$ .

**Methyl 24-methyl-12,24,25-trioxoscalar-16-en-22-oate (ACS Registry No. 81575-81-7) (8):** Pink powder;  $[\alpha]_{\text{D}}^{23} +55.20$  ( $c$  0.25,  $\text{CH}_2\text{Cl}_2$ );  $^{13}\text{C}$  NMR ( $\text{CDCl}_3$ , 400 MHz):  $\delta_{\text{C}} = 213.4$  (qC), 202.1 (CH), 198.4 (qC), 179.9 (qC), 140.7 (CH), 140.6 (qC), 57.6 (CH), 56.1 (CH), 54.6 (CH), 54.3 (CH), 53.3 (qC), 50.7 (CH<sub>3</sub>), 48.7 (qC), 42.0 (CH<sub>2</sub>), 41.3 (CH<sub>2</sub>), 38.3 (CH<sub>2</sub>), 37.3 (qC), 36.9 (CH<sub>2</sub>), 33.8 (qC), 33.4 (CH<sub>3</sub>), 25.1 (CH<sub>3</sub>), 23.1 (CH<sub>3</sub>), 22.5 (CH<sub>3</sub>), 20.0 (CH<sub>2</sub>), 18.4 (CH<sub>2</sub>), 15.0 (CH<sub>3</sub>), 14.0 (CH<sub>3</sub>).

**22-Hydroxy-24-methyl-12,24-dioxoscalar-16-en-25-al (ACS Registry No. 75587-67-6) (9):** White oil;  $[\alpha]_{\text{D}}^{23} +84.75$  ( $c$  0.51,  $\text{CHCl}_3$ );  $^{13}\text{C}$  NMR ( $\text{CDCl}_3$ , 400 MHz):  $\delta_{\text{C}} = 210.4$  (qC), 202.4 (CH), 198.4 (qC), 140.9 (CH), 62.6 (CH<sub>2</sub>), 59.5 (CH), 56.7 (CH), 55.0 (CH), 54.7 (CH), 53.2 (qC), 42.4 (CH<sub>2</sub>), 42.0 (CH<sub>2</sub>), 41.6 (qC), 38.5 (CH<sub>2</sub>), 37.6 (qC), 33.9 (qC), 33.8 (CH<sub>2</sub>), 33.0 (CH<sub>3</sub>), 25.2 (CH<sub>3</sub>), 23.2 (CH<sub>2</sub>), 21.8 (CH<sub>3</sub>), 18.3 (CH<sub>2</sub>), 17.8 (CH<sub>2</sub>), 15.9 (CH<sub>3</sub>), 15.0 (CH<sub>3</sub>).
